# Supplementary material
Source: PubMed Central journal article supplement (PMC6880946)
Supplement: NIHMS1056883-supplement-SI.pdf [file NIHMS1056883-supplement-SI.pdf]

## Supplementary Information

### Stem Cell-Derived Exosomes as Nanotherapeutics for Autoimmune and Neurodegenerative Disorders

Milad Riazifar<sup>†,■</sup>, M. Rezaa Mohammadi<sup>‡,■</sup>, Egest J. Pone<sup>†,§</sup>, Ashish Yeri<sup>||</sup>, Cecilia Lässer<sup>⊥</sup>, Aude I. Segaliny<sup>†</sup>, Laura L. McIntyre<sup>#</sup>, Ganesh Vilas Shelke<sup>⊥,¶</sup>, Elizabeth Hutchins<sup>||</sup>, Ashley Hamamoto<sup>†</sup>, Erika N. Calle<sup>†</sup>, Rossella Crescitelli<sup>⊥</sup>, Wenbin Liao<sup>†</sup>, Victor Pham<sup>†</sup>, Yanan Yin<sup>□</sup>, Jayapriya Jayaraman<sup>†</sup>, Jonathan R.T. Lakey<sup>Δ</sup>, Craig M. Walsh<sup>#</sup>, Kendall Van Keuren-Jensen<sup>||</sup>, Jan Lotvall<sup>⊥</sup>, Weian Zhao<sup>†,\*</sup>

<sup>†</sup>Department of Pharmaceutical Sciences, Sue and Bill Gross Stem Cell Research Center, Chao Family Comprehensive Cancer Center, Edwards Life Sciences Center for Advanced Cardiovascular Technology, Department of Biomedical Engineering, and Department of Biological Chemistry, University of California, Irvine, CA, 92697, USA.

<sup>‡</sup>Department of Materials Science and Engineering, University of California, Irvine, CA, 92697, USA.

<sup>§</sup>Department of Physiology & Biophysics, Vaccine Research & Development Center, University of California, Irvine, CA, 92697, USA.

<sup>||</sup>Neurogenomics Division, Translational Genomics Research Institute, Phoenix, AZ, 85004, USA

<sup>⊥</sup>Krefting Research Centre, Institute of Medicine, The Sahlgrenska Academy, University of Gothenburg, Gothenburg 40530, Sweden.

<sup>#</sup>Department of Molecular Biology and Biochemistry, Sue and Bill Gross Stem Cell Center, Multiple Sclerosis Research Center, University of California, Irvine, Irvine, CA 92697, USA

<sup>¶</sup>Department of Surgery, Institute of Clinical Sciences, University of Gothenburg and Sahlgrenska University Hospital, Gothenburg, Sweden.

<sup>□</sup>Department of Biochemistry and Molecular Cell Biology, Shanghai Jiao Tong University School of Medicine, Shanghai 200025, China

<sup>Δ</sup>Department of Surgery, University of California, Irvine, Orange, CA, 92868, USA

<sup>■</sup>M. Riazifar and M. R. Mohammadi contributed equally to this work

\* Correspondence should be addressed to W. Z. ([weianz@uci.edu](mailto:weianz@uci.edu))

## Upregulation of MHC II after priming with IFN- $\gamma$

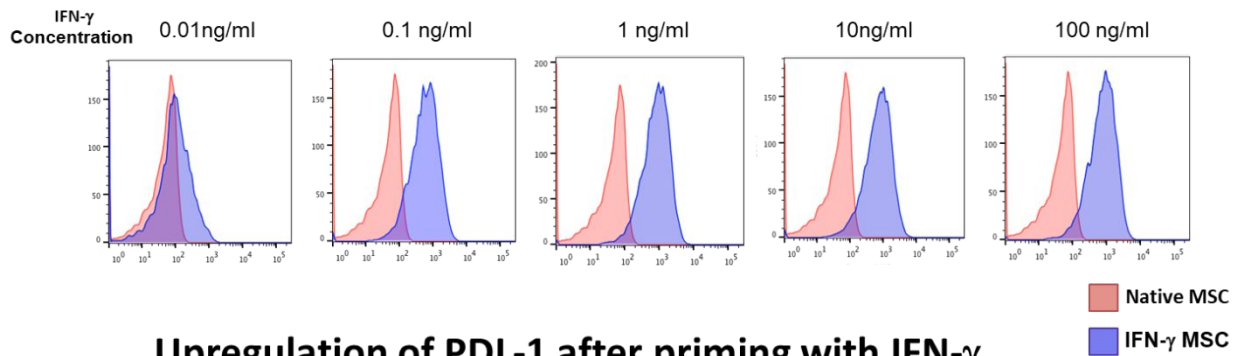

## Upregulation of PDL-1 after priming with IFN- $\gamma$

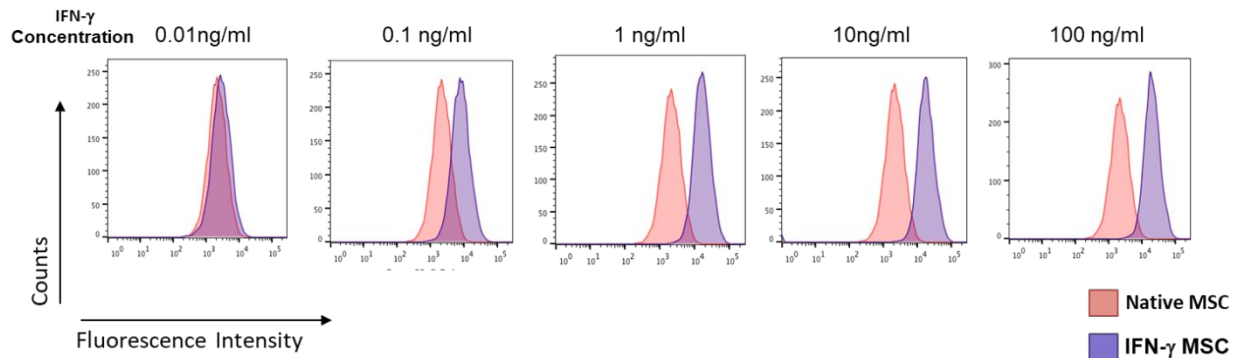

**Figure S1.** Flow cytometry analyses show upregulation of major histocompatibility complex II (MHCII) (Top panel) and programmed death-ligand 1 (PD-L1) (bottom panel) expression on MSCs under different concentrations of IFN $\gamma$  compared to Native MSCs. 10 ng/ml IFN $\gamma$  was eventually chosen for the study.

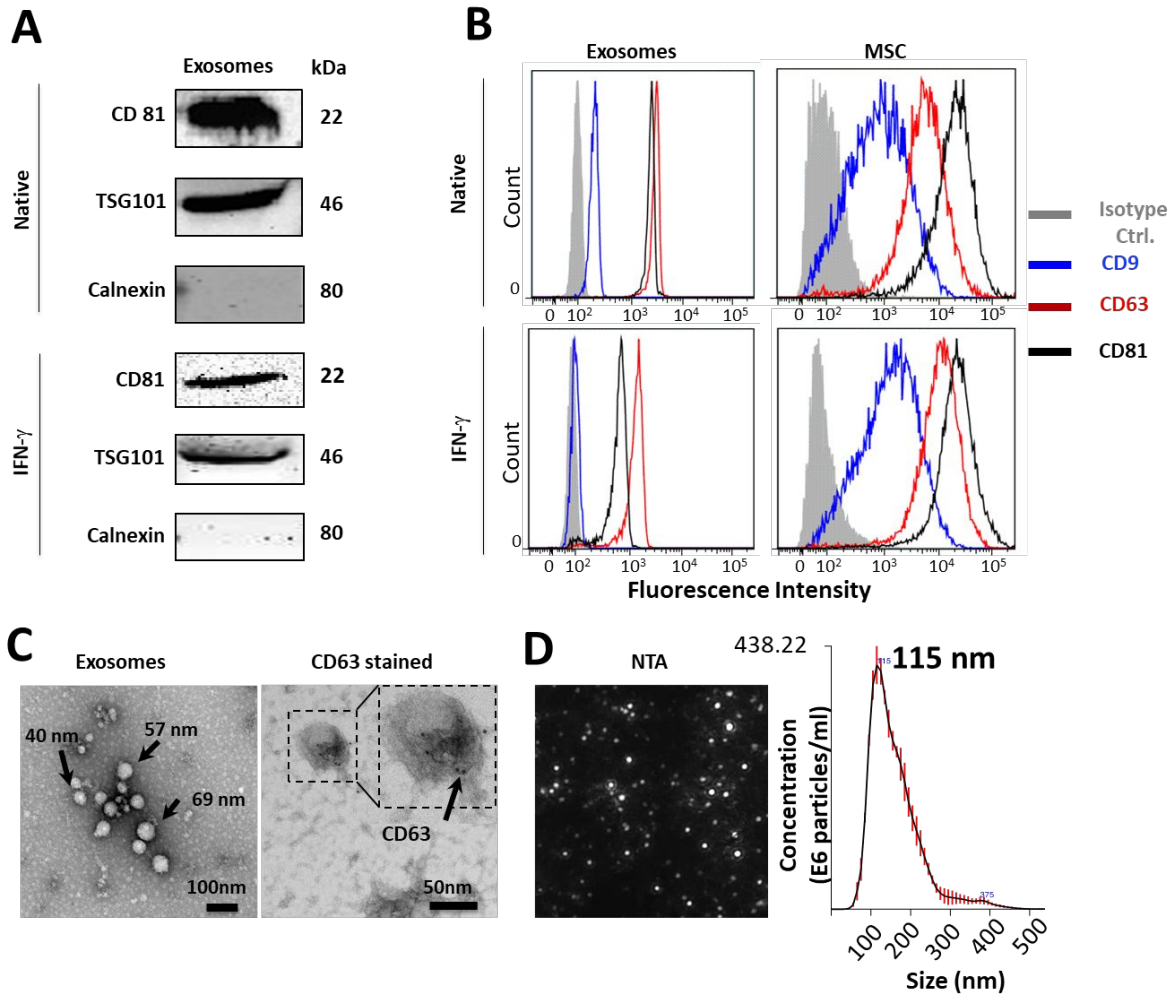

**Figure S2. Characterization of MSC-derived exosomes.** A) Western blotting of MSC-derived exosomes for CD81, TSG101 and Calnexin. B) Flow cytometry analysis of CD9, CD63 and CD81 expression on MSC exosomes bound to anti-CD63-coated beads and MSC. C) Electron microscopy images of native MSC exosomes (left) and exosomes using immunogold staining against CD63 (right). D) Representative captured screen shot of video of particles scattering light with the dilution (1/100) of the IFN $\gamma$ -Exo as prepared (left); Representation of particle size (nm) and concentration (particles/ml) analyzed using nanoparticle-tracking analysis (NTA).

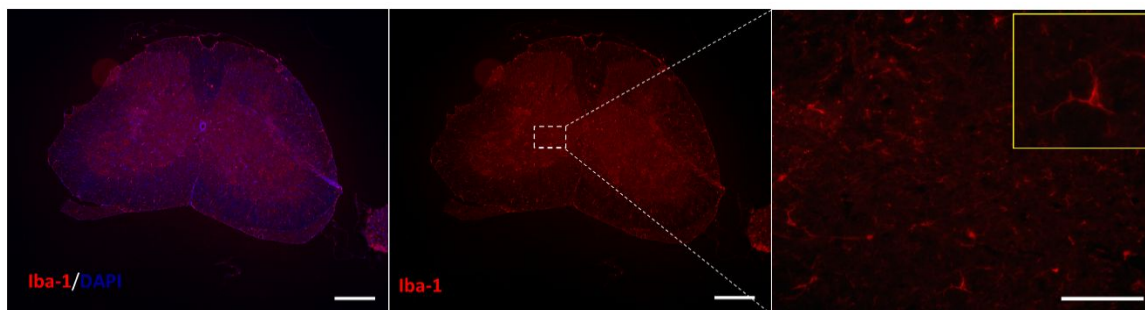

**Figure S3.** Immunohistochemistry of Iba-1, indicative of resident resting macrophages/microglia, and the nuclear stain DAPI in control healthy group. Yellow inset frames are magnified images showing the morphology of macrophages. Left and middle panel Scale: 400  $\mu$ m; Right panel Scale: 80  $\mu$ m.

### FSC-SSC/7AAD-/Single cells

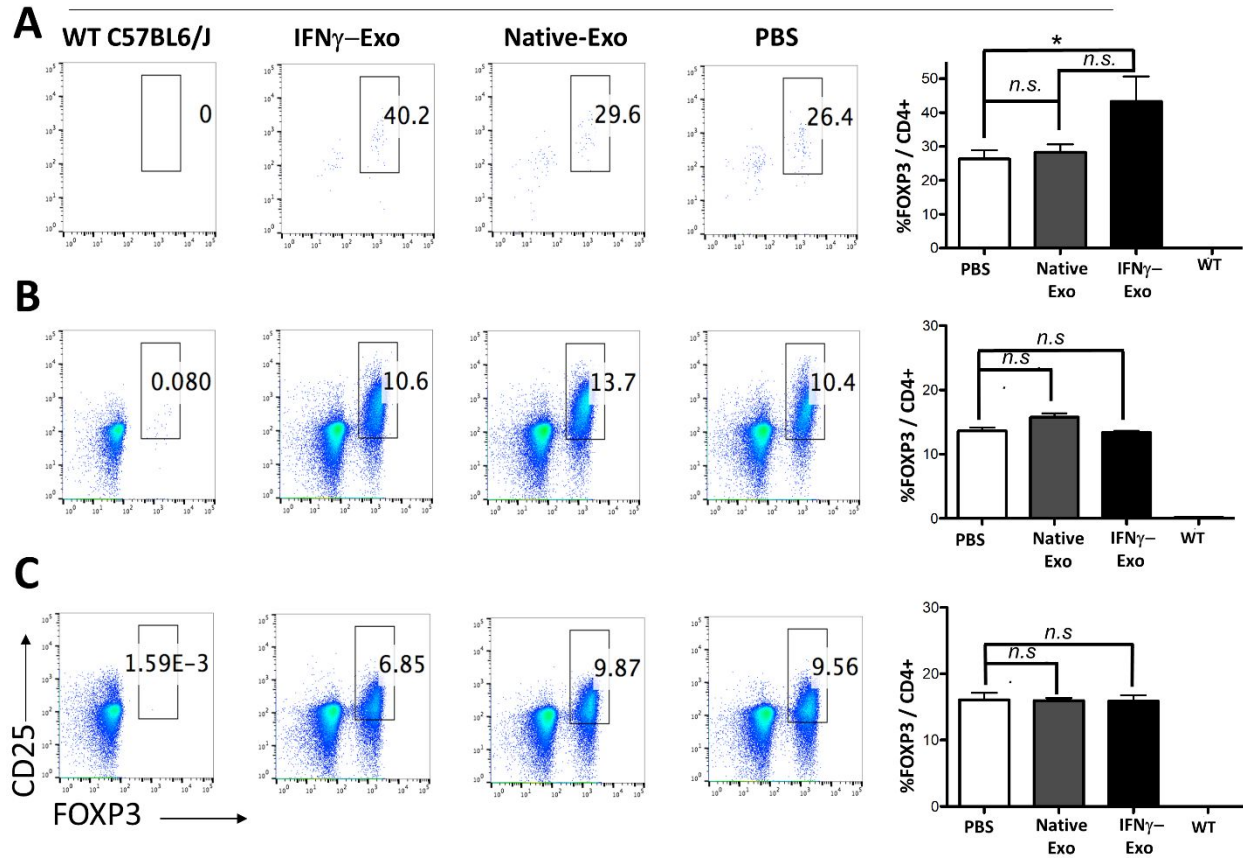

**Figure S4. Representative flow cytometry plots and their quantification of CD4+CD25+FOXP3+ Tregs within A) spinal cords B) spleens and C) lymph nodes of PBS (n=3) of Native Exo (n=3), and IFN $\gamma$ -Exo (n=3) treated EAE mice. Unpaired t-tests were used to determine  $p$  values. (*n.s.* non-significant,  $*p < 0.05$ ;  $**p < 0.01$ ).**

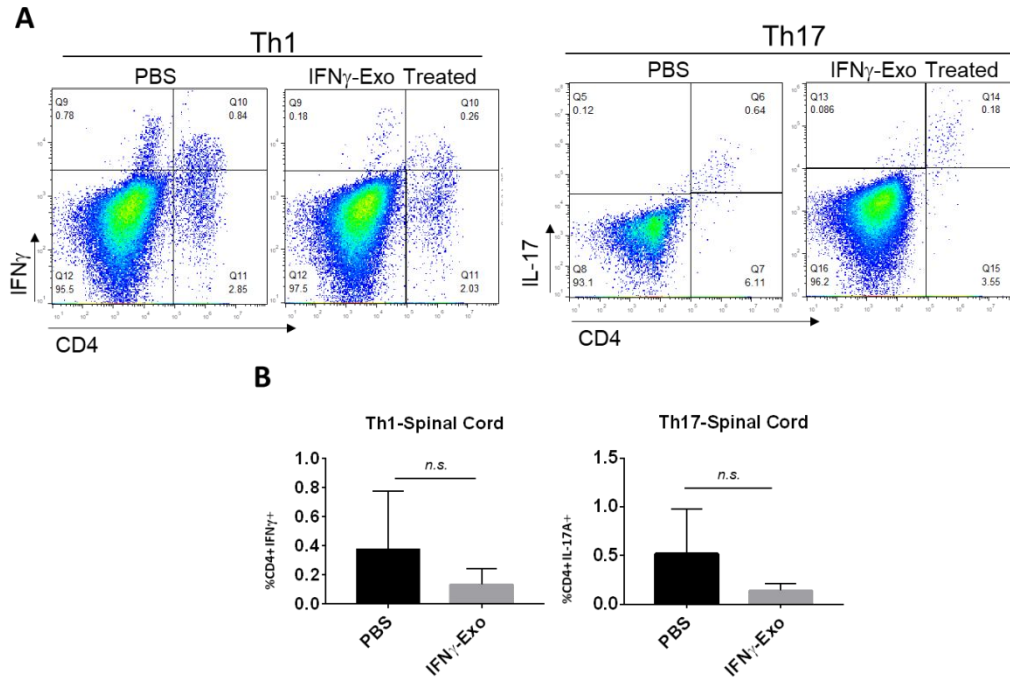

**Figure S5.** A) Representative flow cytometry plots and their quantification for spinal cords of PBS (n=3) and IFN $\gamma$ -Exo (n=3) treated EAE mice, gated for CD4+IFN $\gamma$ <sup>+</sup> and CD4+IL-17A<sup>+</sup> as representatives of Th1 and Th17, respectively. B) Plots are quantified for Th1/Th17. Unpaired t-tests were used to determine *p* values. (*n.s.* non-significant).

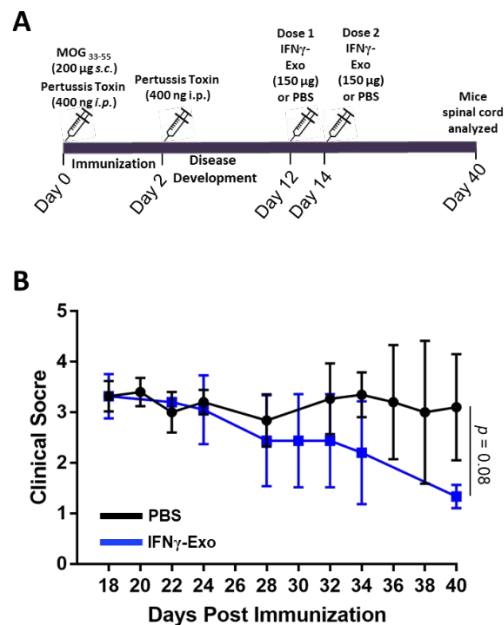

**Figure S6.** A) Schematic representation of early intervention procedure to treat EAE mice. IFN $\gamma$  activated UC-MSC derived Exosomes (IFN $\gamma$ -Exo) or PBS were injected *i.v.* to mice at days 12 and 14 (before disease peak, n=4 for each group). B) IFN $\gamma$ -Exo treatment led to a robust trend toward decreased clinical score that neared significance (*p*=0.08). Clinical scoring was conducted from day 18 till day 40 after immunization. Mann-Whitney t-tests were used to determine the *p* values.

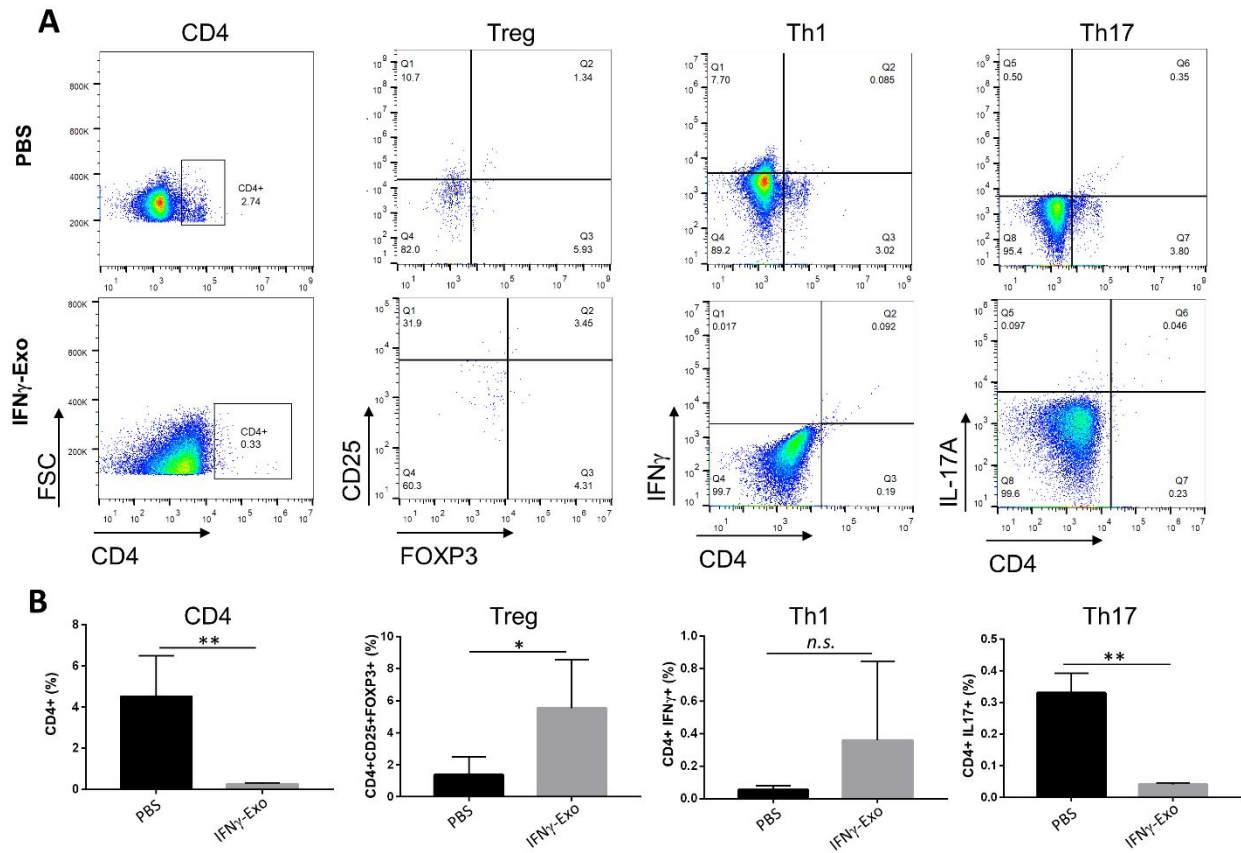

**Figure S7.** A) Representative flow cytometry plots and their quantification for spinal cords of PBS (n=3) and IFN $\gamma$  activated UC-MSC derived Exosomes (IFN $\gamma$ -Exo) (n=3) treated mice, gated for CD4, Th1, Th17, and Treg, and B) their corresponding quantifications. Unpaired t-tests were used to determine *p* values. (*n.s.* non-significant, \**p* < 0.05; \*\**p* < 0.01).

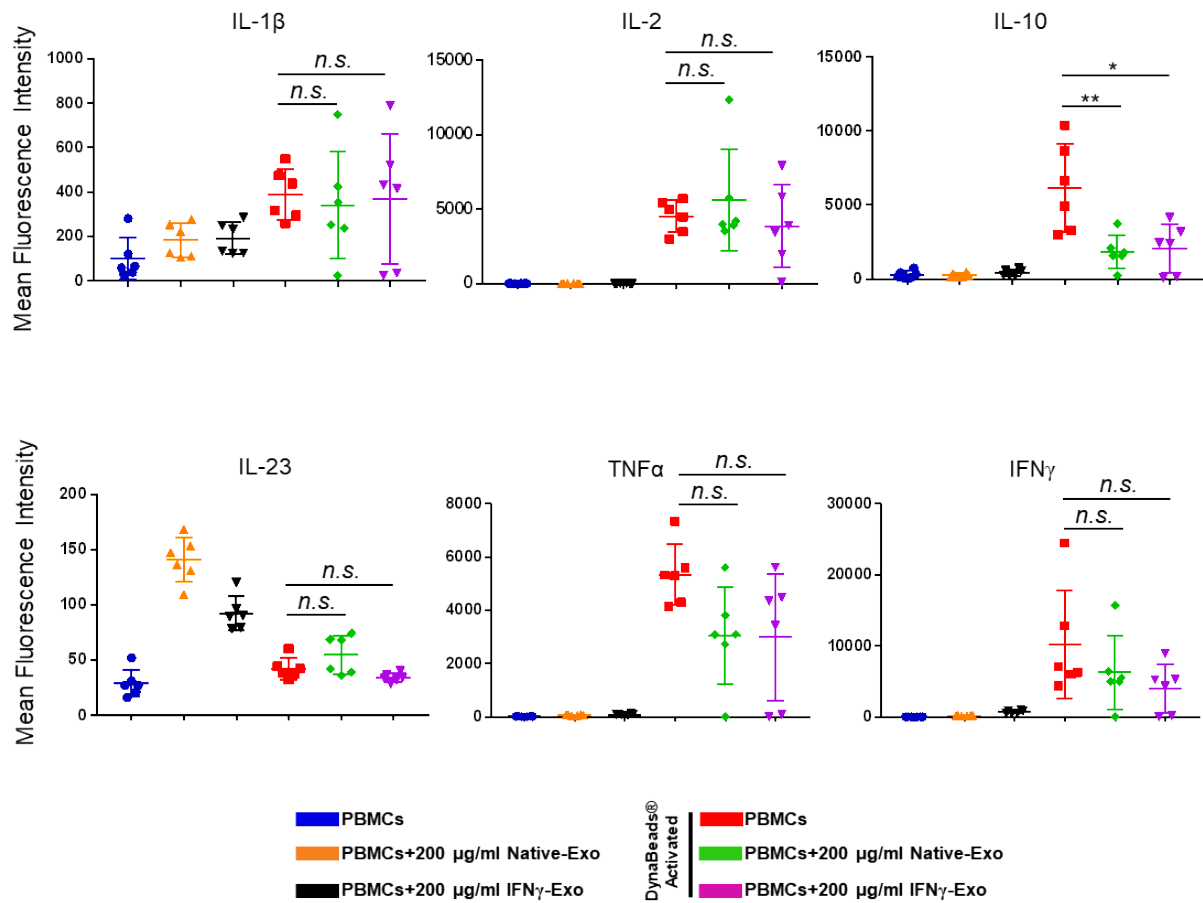

**Figure S8.** Human PBMCs stimulated for 4 d with Dyna $^{\circledR}$  beads, in the absence or presence of exosomes produced by native or IFN $\gamma$ -stimulated MSCs. Supernatants were harvested and secreted cytokine analyzed using Luminex MAGPIX $^{\text{TM}}$ . Unpaired t-tests were used to determine  $p$  values. (n.s. non-significant, \* $p < 0.05$ ; \*\* $p < 0.01$ ).

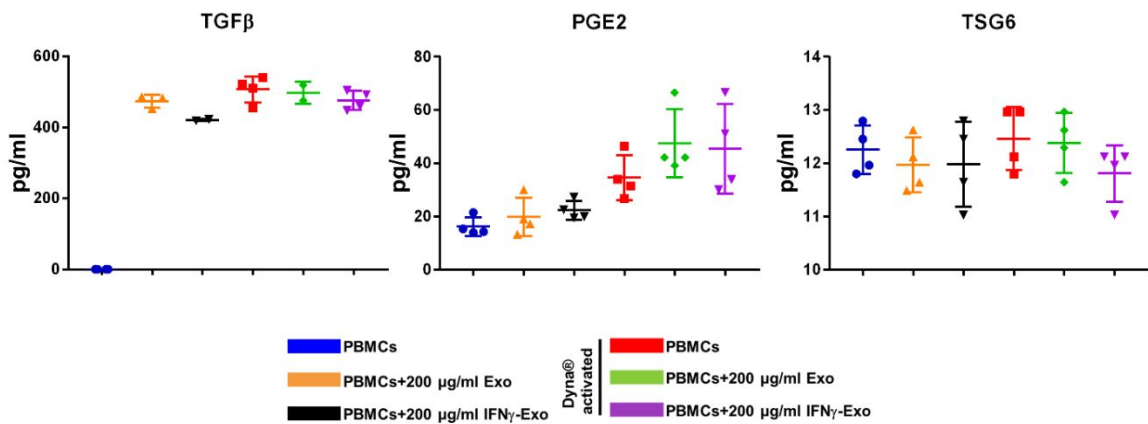

**Figure S9.** Human PBMCs were stimulated with DynaBeads $^{\circledR}$  in the presence and absence of exosomes. Supernatants harvested and secreted cytokine analyzed using ELISA.

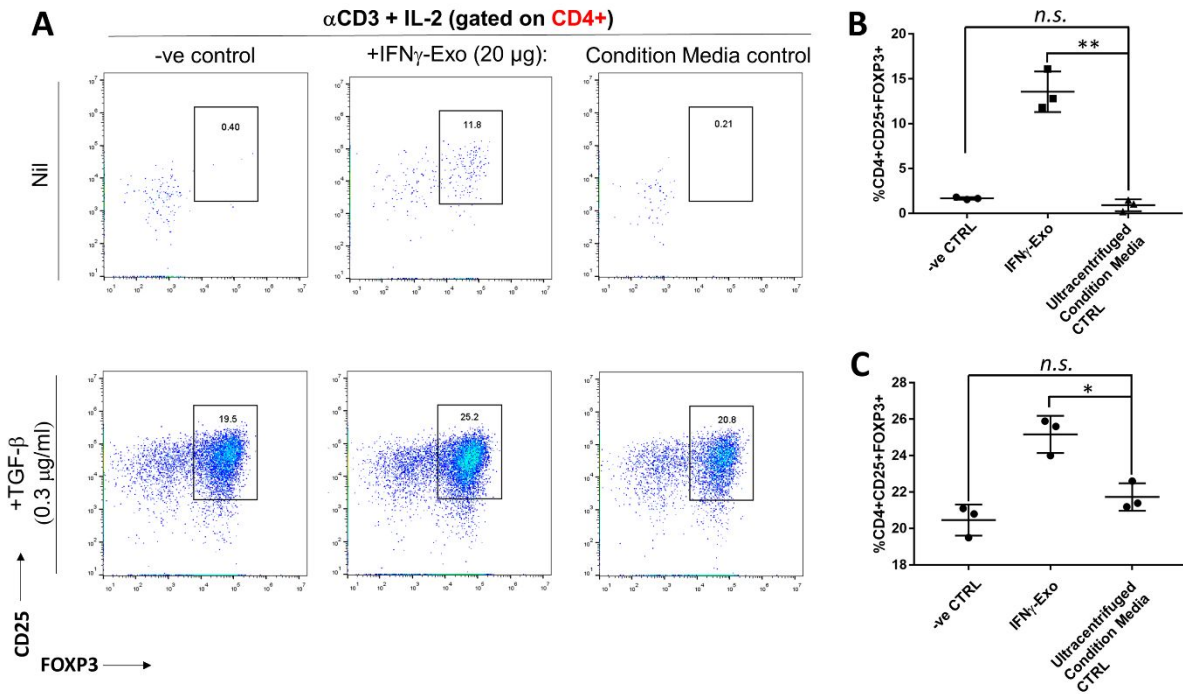

**Figure S10.** Ultracentrifuged culture media with EV depleted serum could not induce Treg in vitro. A) While IFN $\gamma$ -Exo induce Tregs in the presence and absence of TGF $\beta$ , non-condition media control does not show significant Treg induction in the splenocyte in vitro culture. B) There was no statistical difference between number of CD4+CD25+FOXP3+ cells in the absence and C) presence of TGF $\beta$  compared to negative control. Unpaired t-tests were used to determine  $p$  values. ( $n=3$  for each group;  $n.s.$  non-significant  $*p < 0.05$ ;  $**p < 0.01$ ).



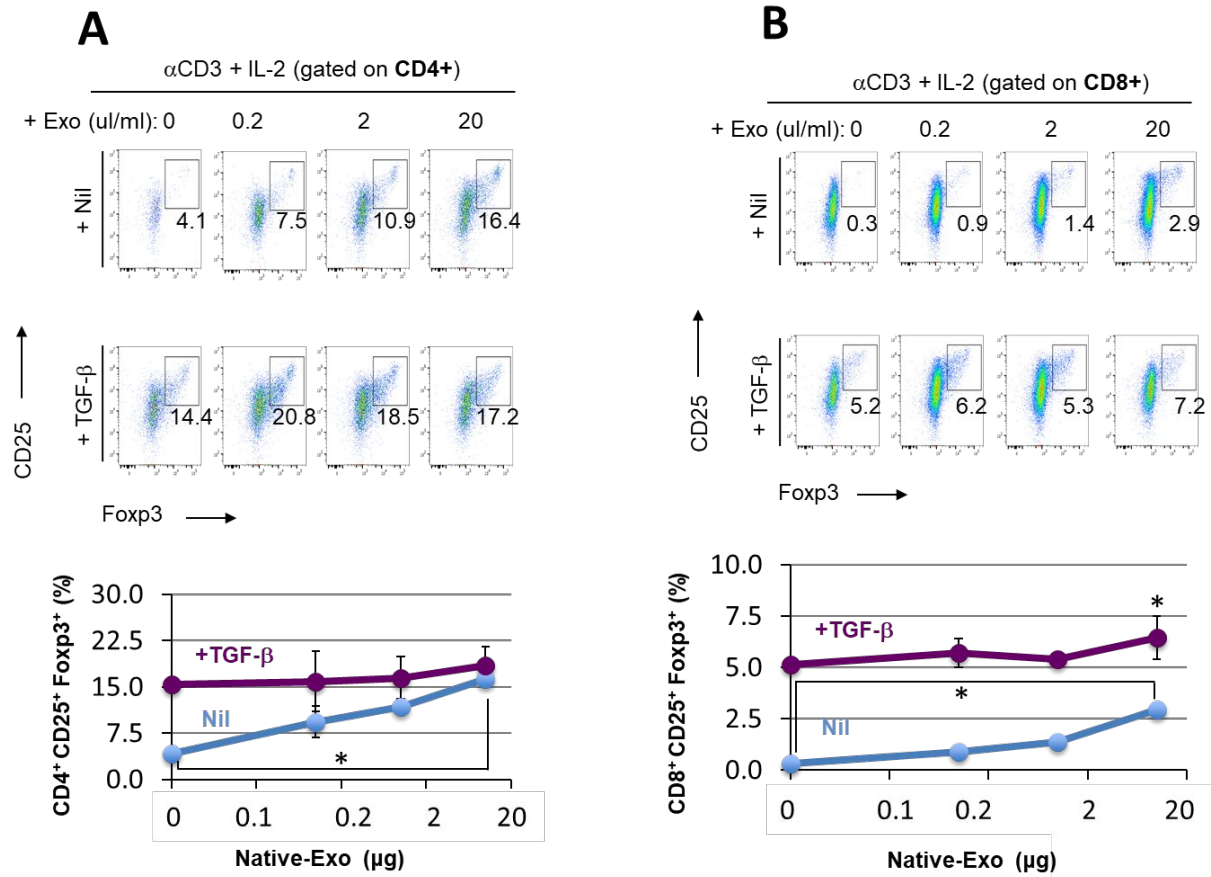

**Figure S11.** FOXP3-eGFP mice splenocytes were stimulated with anti-CD3 + IL-2 with or without TGF $\beta$ , and were further cultured in the presence of indicated concentrations of Native-Exo. Representative flow cytometry plots of CD4+ gate (A) or CD8+ gate (B). Statistical analyses were conducted between 0  $\mu$ g and 20  $\mu$ g Native-Exo (n=3 per concentration; \*p < 0.05). Unpaired t-tests were used to determine p values.

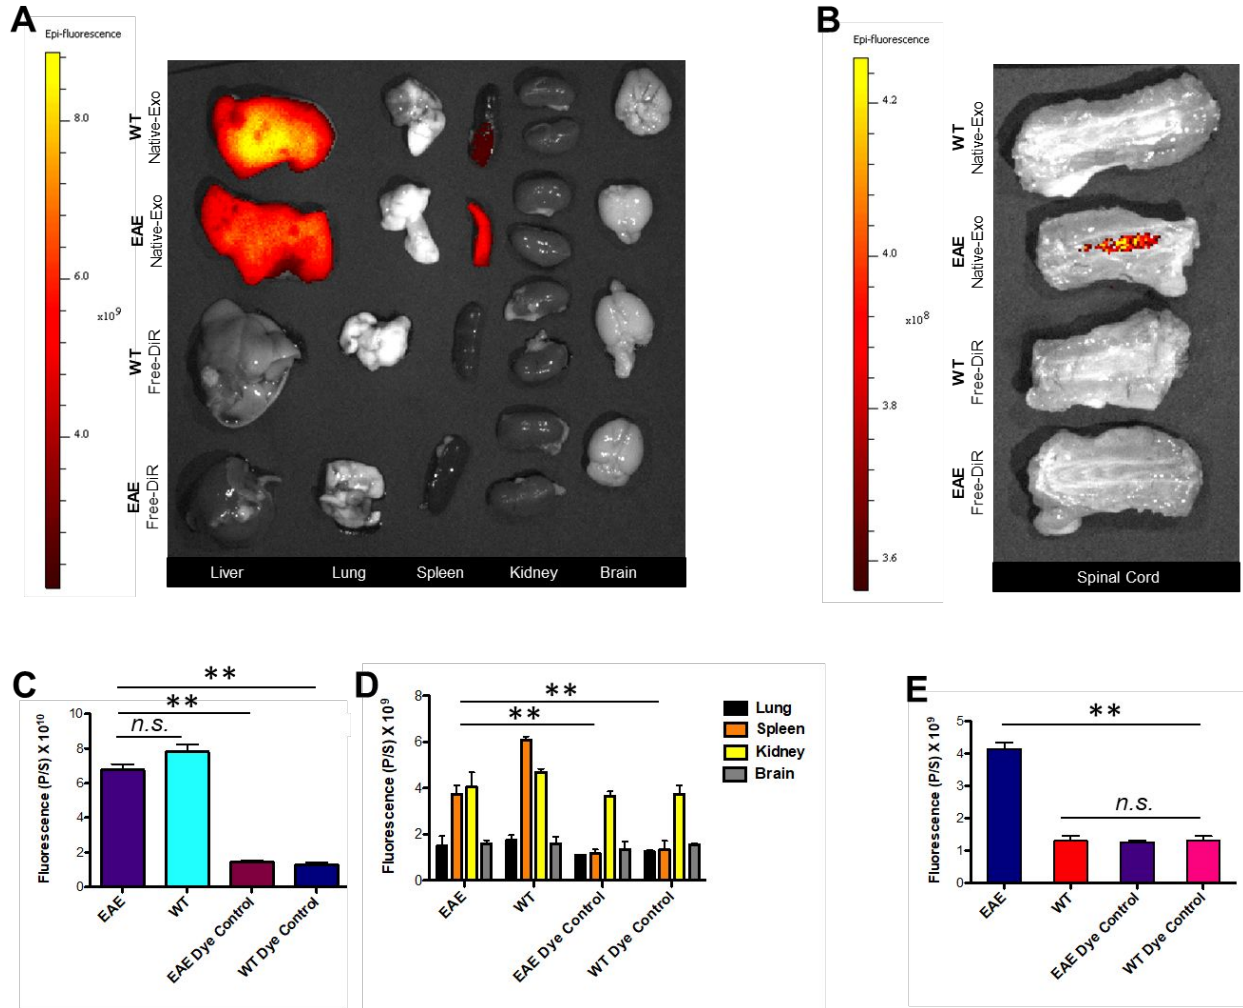

**Figure S12. Biodistribution of Native-Exo *in vivo*.** A) Representative IVIS images of different organs harvested at 3 hours following i.v. infusion of DiR labeled Native-Exo into healthy and EAE mice. Control groups received DiR dye alone (EAE-DiR, WT-DiR) to determine the background. B) Representative IVIS images of spinal cords 3 hours post injection of DiR labeled Native-Exo. C, D) Quantification of the fluorescent signal in different organs including liver, spleen, kidney, brain and lung at 3 hours following infusion of DiR labeled Native-Exo. (n=3; *n.s.* non-significant, \*\**p* < 0.01). E) Quantification of the fluorescent signal in spinal cords at 3 hours post injection of DiR labeled Native-Exo. (n=3; *n.s.* non-significant, \*\**p* < 0.01). Unpaired t-tests were used to determine *p* values.

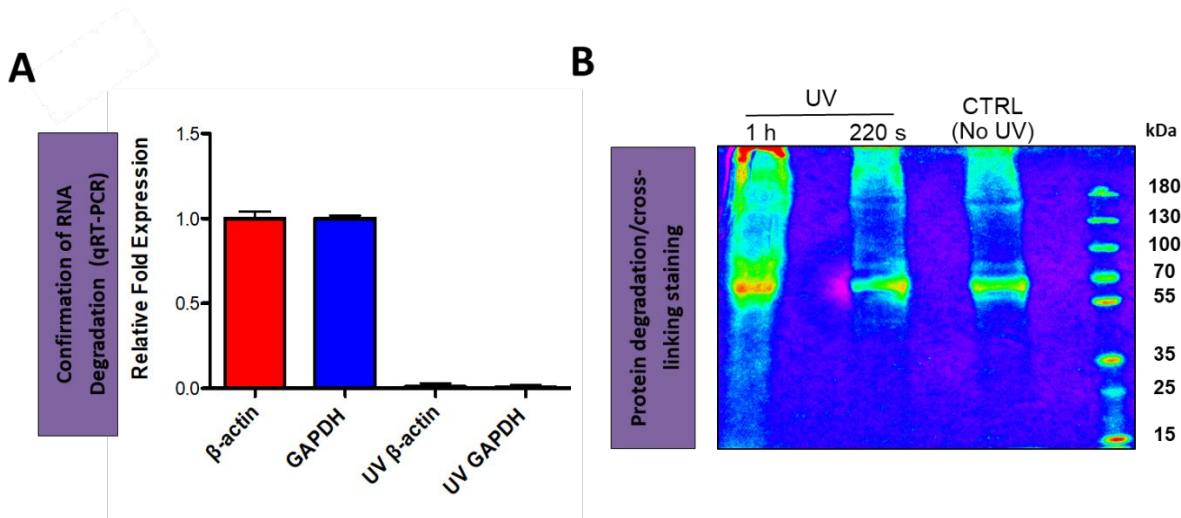

**Figure S13. Inactivation of exosomal RNAs using UV.** A) qRT PCR for  $\beta$ -actin (IFN $\gamma$ -Exo) and GAPDH (Native-Exo) which confirms inactivation of RNA. 220 s UC exposure data was shown in this panel. B) Blue BANDit™ protein staining experiment showing exosomal protein crosslinking and degradation following 1 h UV treatment.

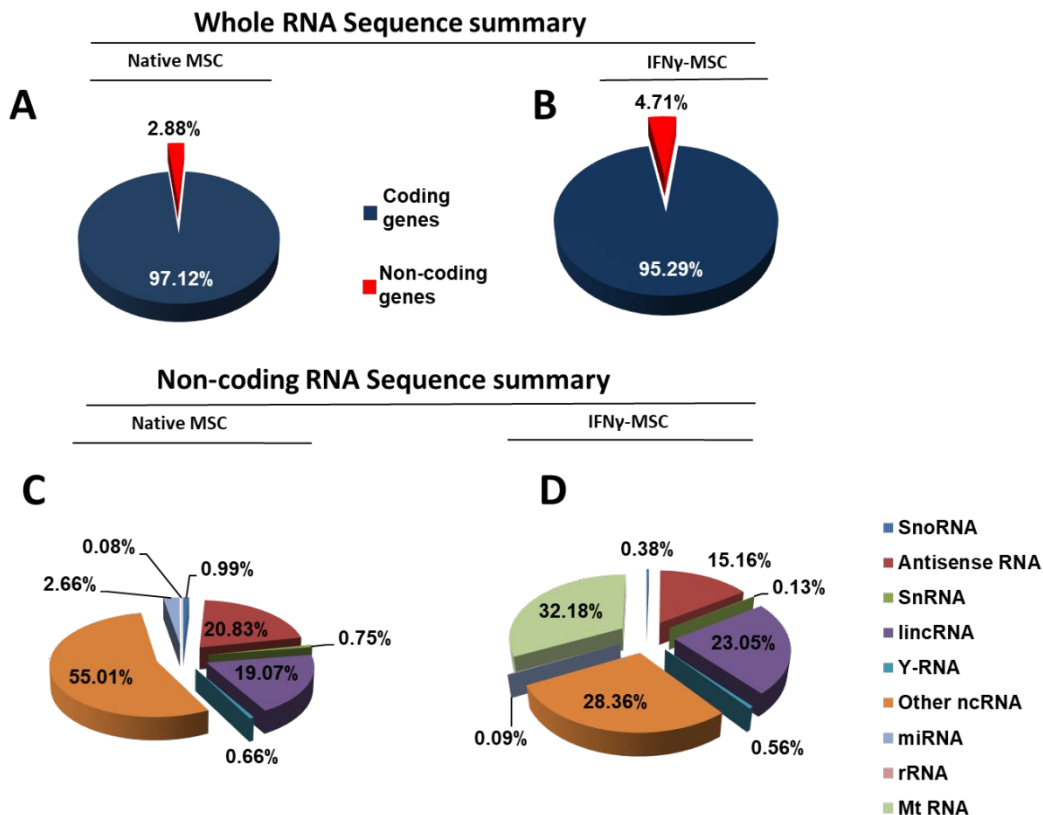

**Figure S14. Deep RNA whole transcriptome analysis of native MSC and IFN $\gamma$ -MSC.** A) Whole RNA sequence summary of Native MSC. B) Whole RNA sequence summary of IFN $\gamma$  MSC C) Non-coding RNA sequence summary (percentage of different types of non-coding RNAs) of Native MSC. D) Non-coding RNA sequence summary (percentage of different types of non-coding RNAs) of IFN $\gamma$  MSC.

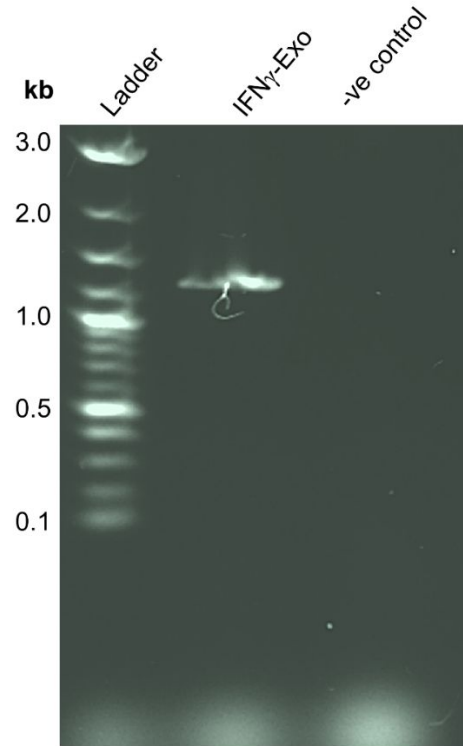

**Figure S15.** RT-PCR assay showed the presence of IDO1 mRNA within IFN $\gamma$ -Exo. Resultant RT-PCR amplicons are approximately 1.2 kb, which is the size of full-length IDO-1 mRNA.

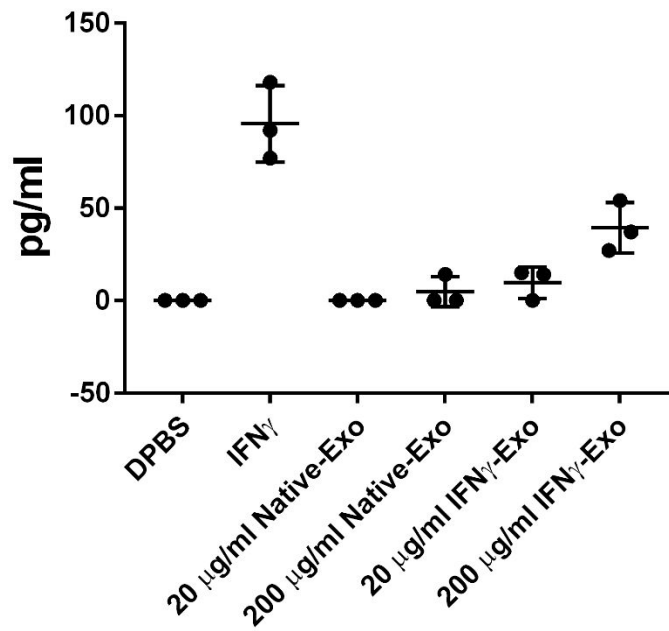

**Figure S16.** ELISA assay was conducted to measure the residual IFN $\gamma$  from the culture medium to the IFN $\gamma$ -Exo. 0.1 ng/ml of human IFN $\gamma$  was used as a positive control.

**Table S1.** Most abundant RNA transcripts in the exosome fraction.

| <b>Gene Symbol</b> | <b>Gene Name</b>                         | <b>IFN-<math>\gamma</math>-Exo</b> | <b>Native-Exo</b> |
|--------------------|------------------------------------------|------------------------------------|-------------------|
| <b>HSP90AA1</b>    | heat shock protein 90kDa alpha           | 621                                | 575               |
| <b>SOD1</b>        | Superoxide dismutase 1                   | 290                                | 269               |
| <b>ACTB</b>        | actin, beta                              | 13009                              | 12091             |
| <b>S100A10</b>     | S100 calcium binding protein A10         | 1632                               | 1746              |
| <b>ANXA1</b>       | annexin A1                               | 467                                | 493               |
| <b>TPM4</b>        | tropomyosin 4                            | 4228                               | 5263              |
| <b>MYL9</b>        | myosin, light chain 9, regulatory        | 2112                               | 2613              |
| <b>GAPDH</b>       | glyceraldehyde-3-phosphate dehydrogenase | 11494                              | 12636             |
| <b>TMSB10</b>      | thymosin beta 10                         | 8439                               | 5482              |

**Table S2.** Pathway analysis miRNA in IFN $\gamma$ -Exo using ingenuity database.

| <b>Top canonical pathways</b>       | <b>Number of affected genes</b> |
|-------------------------------------|---------------------------------|
| Molecular Mechanisms of Cancer      | 34/365                          |
| Pancreatic Adenocarcinoma Signaling | 19/106                          |
| PI3K/AKT Signaling                  | 19/123                          |
